# Supplementary material for: An ancient genomic regulatory block conserved across bilaterians and its dismantling in tetrapods by retrogene replacement
Source: HighWire-hosted journal article supplement (doi:10.1101/gr.132233.111), 2012-01-10
Supplement: Maeso_Suppl_Discussion.pdf [file Maeso_Suppl_Discussion.pdf]

## **An ancient genomic regulatory block conserved across bilaterians and its dismantling in tetrapods by retrogene replacement**

Ignacio Maeso, Manuel Irimia, Juan J. Tena, Esther González-Pérez, David Tran, Vydianathan Ravi, Byrappa Venkatesh, Sonsoles Campuzano, José Luis Gómez-Skarmeta, and Jordi Garcia-Fernández

### **Supplementary Discussion S1**

#### **Evolutionary scenario for the origin of the amphioxus *Irx* cluster**

The presence of four paralogous arrays of CNRs, together with data from phylogenetic analysis (Irimia et al 2008) and CNR similarity (Supplementary Fig. 4) indicating that A duplicate is more closely related to C and that B is more similar to D, provide a more detailed picture of the evolutionary origin of the amphioxus *Irx* cluster (Supplementary Fig. S5). First, a single tandem duplication of *Irx*, *Sowah* and their associated CNRs generated the ancestors of *IrxA–C* and *IrxB–D* (and their neighbouring *Sowah* genes). Then, this pair duplicated again, giving rise to the four *Irx* genes (*A*, *B*, *C* and *D*) with their respective *Sowah* genes and CNRs. Finally, *IrxC* and its downstream CNRs translocated from its ancestral position next to *SowahC* to a more upstream location, whereas *IrxD* and its downstream CNRs were completely lost. The fact that *IrxC* is now exactly in the place where the lost *IrxD* would be expected to lie suggests that these two events (translocation and loss) are probably related (perhaps through non-homologous recombination between *IrxC* and *IrxD*). In parallel to these processes, nearly all the exonic sequences from three of the *Sowah* duplicates were erased whereas most of their intronic CNRs have been maintained (Fig. 2).

### **Supplementary Discussion S2**

#### **Ancestral organization of the vertebrate clusters and orthology of *Irx7***

*Sowah1* is linked to a solitary and divergent member of the *Irx* family in teleosts, *Irx7*, which is the only paralog that has not been confidently assigned to any of the four *Irx* complexes yet, despite extensive efforts and debate (Lecaudey et al. 2001; Itoh et al. 2002; Dildrop and R  ther 2004; Feij  o et al. 2004; Lecaudey et al. 2005). Although *Irx7* seems to be more related to *Irx1/3* (Itoh et al. 2002; Lecaudey et al. 2005), only

*Irx2b* and *Irx6b* seem to be missing out of the 12 expected *Irx* genes generated after the teleost-specific round of WGD (Dildrop and R  ther 2004; Feij  o et al. 2004) (Fig. 6b). Our results on the relative orientation of *Sowah1* and *Irx7* may help to solve this question. *Sowah2* is located next to *Irx5b*, in a head to head orientation. This is probably the ancestral orientation of the *Sowah-Irx* block in bilaterians since it has been maintained in almost all lineages in at least one *Iroquois* gene (Supplementary Fig. S1).

Thus, the original configuration of the vertebrate *Irx-Sowah* cluster before the WGDs was likely:  $\text{>Irx1/3>}$ ,  $\text{<Sowah<}$ ,  $\text{>Irx2/5>}$ ,  $\text{>Irx4/6>}$ . Only *Irx1/3* would have changed the ancestral orientation to *Sowah*, a change that is also supported by the inverted orientation of the duplicated Ultra Conserved Regions (UCRs) located near *Irx1/Irx3* respect the UCRs next to *Irx4/Irx6* (Fig. 6). If *Irx7* were one of the “missing” teleost *Irx* genes (*Irx2b* or *Irx6b*)(Dildrop and R  ther 2004; Feij  o et al. 2004), the expected orientation between *Sowah1* and *Irx7* should be head to head. Instead, they are oriented tail to head, just as expected for a *Irx1/3* gene (Fig. 6b). This, together with the higher sequence similarity observed with *Irx1* and *Irx3*, suggests an alternative hypothesis: *Irx7* would be the third copy of the *Irx1/3* paralogous group or, in other words, the only remains of a third *Irx* cluster that was still present in the last common ancestor of tetrapods and teleost fishes, and was completely loss in the former lineage.
